# Supplementary material for: Characterisation and optimisation of ion discrimination in a mini ion funnel for a miniature mass spectrometer
Source: Royal Society of Chemistry journal article supplement (doi:10.1039/c9ay00677j), 2019-01-01
Supplement: c9ay00677j1.pdf [file c9ay00677j1.pdf]

## Supplementary Information

# Characterization and Optimization of Ion Discrimination in a Mini Ion Funnel for Miniature Mass Spectrometer

Xiaohua Zhang<sup>a, +</sup>, Xinming Huo<sup>b, +</sup>, Fei Tang<sup>\*, b</sup>, Zhuoyue Zha<sup>c</sup>, Fengbo Yang<sup>c</sup>,

Yafan Ni<sup>c</sup>, Yanjun Wang<sup>c</sup>, Mingfei Zhou<sup>a</sup>, Xiaohao Wang<sup>b, d</sup>

*a Department of Chemistry, Fudan University, Shanghai 200433, China*

*b State Key Laboratory of Precision Measurement Technology and Instruments, Department of Precision Instrument, Tsinghua University, Beijing 100084, China. Email: tangf@mail.tsinghua.edu.cn*

*c Anyeep Instrumentation Company, Suzhou 215129, China*

*d Division of Advanced Manufacturing, Graduate School at Shenzhen, Tsinghua University, Shenzhen 518055, China*

*+ These authors contributed equally to this work*

### Corresponding Author

\* To whom correspondence should be addressed:

Fei Tang, tangf@mail.tsinghua.edu.cn

## Calculation of Collision Coefficient (C)

In general, there are two models – the hard-sphere collision model and the Langevin collision model – applicable to the collision between ions and neutral gas molecules<sup>1, 2</sup>. The Langevin collision model takes into account the induction of dipoles in neutral gas molecules by ions and can better estimate the low-energy collision between small-molecule ions and neutral particles<sup>3</sup>. In the Langevin collision model, the collision cross-section (CCS) between ions and neutral gas molecules can be calculated as follows<sup>2, 4, 5</sup>:

$$\sigma_D \approx \frac{2\pi e}{u} \sqrt{\frac{\alpha_p(M+m)}{\epsilon_0 M m}} \quad (1)$$

where  $u$  is the relative speed of ions to gas molecules;  $\alpha_p$ : electric polarizability of the gas molecule;  $\epsilon_0$ : permittivity of vacuum;  $M$ : mass of gas molecule;  $m$ : mass of ion;  $e$ : ion charge. The collision coefficient (C) is estimated as follows, based on Equation (4) in the main part of this paper:

$$C = \frac{c}{\Omega} = \frac{eP}{KTf_{RF}} \sqrt{\frac{\alpha_p(M+m)}{\epsilon_0 M m}} \quad (2)$$

However, in application, the neutral background gas in the miniature ion trap mass spectrometer is air. We use  $N_2$  to estimate the molecular electric polarizability<sup>6</sup>,  $\alpha_p = 1.76 \text{ \AA}^3$ , the relative mass of gas is 28, the air pressure in the first chamber  $P = 500 \text{ Pa}$ ; the temperature is  $25 \text{ }^\circ\text{C}$ ; and the RF frequency of the funnel  $f_{RF} = 860 \text{ kHz}$ . For ions with an  $M/Z$  of 500 Th, the collision coefficient under these circumstances is about 48. In the experiments the collision coefficients calculated by Langevin collision model for reserpine and roxithromycin are 47.85 and 47.56, respectively. Although the mass-to-charge ratio of reserpine is lower than roxithromycin, reserpine has a larger collision coefficient under the same condition.

It should be mentioned that the Langevin collision model does not consider the actual size of ions, while the ion-molecule collision coefficient is apparently related to ion size and its spatial structural form. As a result, we only provide an estimate of the collision coefficient (C) herein as the reference for setting the parameters for theoretical calculations.

## REFERENCES

1. M. He, D. Guo, Y. Feng, X. Xiong, H. Zhang, X. Fang and W. Xu, *Journal of mass spectrometry : JMS*, 2015, **50**, 95-102.
2. E. W. Mcdaniel and E. P. Gray, *Collision Phenomena in Ionized Gases*, Wiley, 1964.
3. K. Nanbu and Y. Kitatani, *Journal of Physics D Applied Physics*, 1999, **28**, 324.
4. G. Gioumouis and D. P. Stevenson, *Journal of Chemical Physics*, 1958, **29**, 294-299.
5. F. A. Londry, R. L. Alfred and R. E. March, *Journal of the American Society for Mass Spectrometry*, 1993, **4**, 687-705.
6. E. W. Mcdaniel and E. A. Mason, *The mobility and diffusion of ions in gases*, Wiley, 1973.
